# Supplementary material for: Differential Responses to UV-A Stress Recorded in Carotenogenic Microalgae Haematococcus rubicundus, Bracteacoccus aggregatus, and Deasonia sp
Source: MDPI journal article supplement (doi:10.3390/plants11111431), 2022-05-27
Supplement: s1 [file s1]

## Supplementary S3. Emission spectrum of the light emitting diodes used in the work

The following LEDs were used in the work: 5M 033220 (Arlight, Russia) (spectral range of 380-415 nm, power of 2.9 W/m<sup>2</sup>) and cold-white LED UV-A LED COB-X544-8mm 24V White6000 (Arlight, Russia) with the photon flux density of 80  $\mu\text{mol}/\text{m}^2/\text{s}$  (Figure S1). Spectra were registered by an Ocean FX miniature spectrometer (Ocean Optics Inc., Great Britain) equipped with an integrative sphere ISP-80-8-R 80 mm in diameter of the same manufacturer.

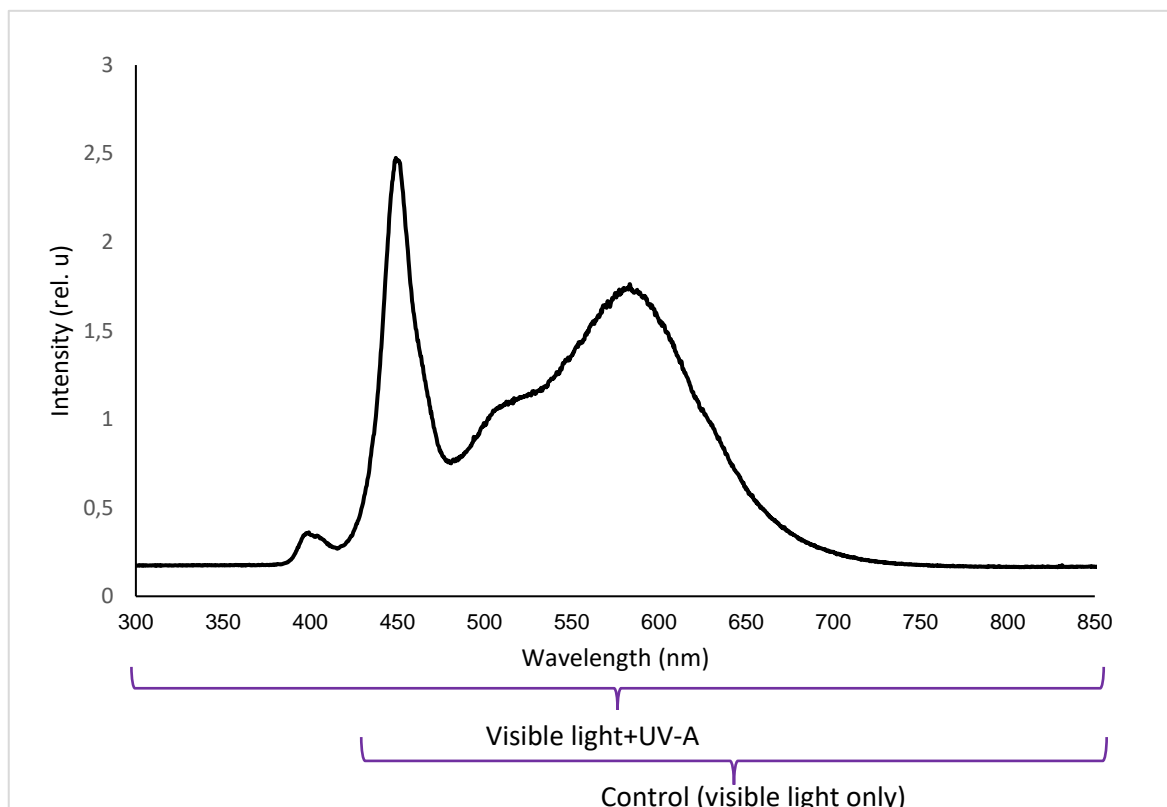

**Figure S3.** Emission spectrum of LEDs used for culturing of algal cells and sunscreen synthesis induction.
